# Supplementary material for: Climatic Niche Differentiation between the Invasive Hornet Vespa velutina nigrithorax and Two Native Hornets in Europe, Vespa crabro and Vespa orientalis
Source: MDPI journal article supplement (doi:10.3390/d15040495), 2023-03-28
Supplement: s1 [file s1]

**Climatic Niche differentiation between the Invasive Hornet  
*Vespa velutina nigrithorax* and two Native Hornets in Europe,  
*Vespa crabro* and *Vespa orientalis***

Simone Lioy, Luca Carisio, Aulo Manino, Marco Porporato

Department of Agriculture, Forest and Food Sciences, University of Turin,  
Largo Paolo Braccini 2, 10095 Grugliasco, Italy

**Supplementary information**

**Table S1.** Number of records of the three *Vespa* species used for the different sections of the analyses.

| Spatial scale                                                                                                                                 | <i>V. velutina</i> | <i>V. crabro</i> | <i>V. orientalis</i> |
|-----------------------------------------------------------------------------------------------------------------------------------------------|--------------------|------------------|----------------------|
| Globally                                                                                                                                      | 24,104             | 28,330           | 363                  |
| Study area (western palearctic and saharo-arabian zoogeographic regions)                                                                      | 23,076             | 26,020           | 312                  |
| Study area (after applying a thinning process of 10 km to account for sampling bias)                                                          | 2,213              | 5,015            | 162                  |
| Area of co-presence of <i>V. v. nigrithorax</i> and <i>V. crabro</i>                                                                          | 9,270              | 11,113           | -                    |
| Area of co-presence of <i>V. v. nigrithorax</i> and <i>V. crabro</i> (after applying a thinning process of 1 km to account for sampling bias) | 5,113              | 7,684            | -                    |

**Table S2.** Mean and Standard Deviation of the climatic variables observed for the three species in the study area (*Vespa velutina nigrithorax*, *V. crabro* and *V. orientalis*) and in the area of co-occurrence (*V. v. nigrithorax* and *V. crabro*).

| Variables                                         | Study Area |       |       |       |       |       | Area of Co-Occurrence |       |       |       |
|---------------------------------------------------|------------|-------|-------|-------|-------|-------|-----------------------|-------|-------|-------|
|                                                   | VVN        |       | VC    |       | VO    |       | VVN                   |       | VC    |       |
|                                                   | MEAN       | SD    | MEAN  | SD    | MEAN  | SD    | MEAN                  | SD    | MEAN  | SD    |
| Bio 01 - Annual Mean Temperature (°C)             | 11.4       | 1.5   | 8.9   | 2.4   | 17.5  | 3.1   | 11.8                  | 1.4   | 11.2  | 1.3   |
| Bio 02 - Mean Diurnal Range (°C)                  | 8.9        | 1.2   | 8.0   | 1.1   | 9.8   | 2.5   | 8.9                   | 1.2   | 8.9   | 0.9   |
| Bio 03 - Isothermality (%)                        | 0.4        | 0.0   | 0.3   | 0.0   | 0.4   | 0.1   | 0.4                   | 0.0   | 0.4   | 0.0   |
| Bio 04 - Temperature Seasonality (°C)             | 53.4       | 5.8   | 62.0  | 12.0  | 59.8  | 12.1  | 53.4                  | 5.7   | 57.1  | 6.4   |
| Bio 05 - Max Temperature of Warmest Month (°C)    | 24.4       | 2.0   | 22.6  | 2.4   | 31.6  | 3.3   | 24.8                  | 2.1   | 24.8  | 2.0   |
| Bio 06 - Min Temperature of Coldest Month (°C)    | 0.7        | 1.9   | -2.6  | 3.7   | 5.3   | 4.1   | 1.1                   | 1.6   | 0.2   | 1.6   |
| Bio 07 - Temperature Annual Range (°C)            | 23.6       | 2.6   | 25.2  | 3.9   | 26.3  | 5.2   | 23.6                  | 2.6   | 24.6  | 2.4   |
| Bio 08 - Mean Temperature of Wettest Quarter (°C) | 9.5        | 4.2   | 12.5  | 4.7   | 12.0  | 4.0   | 9.8                   | 3.7   | 12.1  | 4.6   |
| Bio 09 - Mean Temperature of Driest Quarter (°C)  | 13.3       | 6.4   | 5.3   | 6.6   | 23.7  | 5.1   | 14.0                  | 6.3   | 9.8   | 5.9   |
| Bio 10 - Mean Temperature of Warmest Quarter (°C) | 18.2       | 1.6   | 16.8  | 1.9   | 25.1  | 2.6   | 18.6                  | 1.5   | 18.4  | 1.5   |
| Bio 11 - Mean Temperature of Coldest Quarter (°C) | 4.5        | 1.9   | 1.0   | 3.5   | 10.0  | 4.0   | 5.0                   | 1.7   | 3.8   | 1.6   |
| Bio 12 - Annual Precipitation (mm)                | 810.1      | 145.6 | 751.7 | 173.2 | 599.4 | 298.0 | 806.5                 | 143.8 | 757.4 | 136.0 |
| Bio 13 - Precipitation of Wettest Month (mm)      | 90.5       | 23.4  | 85.4  | 22.9  | 121.3 | 60.4  | 91.1                  | 24.6  | 81.4  | 23.7  |
| Bio 14 - Precipitation of Driest Month (mm)       | 45.6       | 11.0  | 42.3  | 13.1  | 5.6   | 10.4  | 43.7                  | 11.1  | 45.4  | 10.3  |
| Bio 15 - Precipitation Seasonality (mm)           | 18.3       | 9.3   | 21.5  | 9.4   | 79.7  | 22.7  | 19.0                  | 9.9   | 15.4  | 10.2  |
| Bio 16 - Precipitation of Wettest Quarter (mm)    | 248.8      | 64.1  | 240.1 | 64.2  | 317.7 | 158.3 | 251.0                 | 65.9  | 223.0 | 64.8  |
| Bio 17 - Precipitation of Driest Quarter (mm)     | 158.9      | 32.6  | 139.9 | 40.0  | 22.9  | 35.8  | 155.4                 | 32.2  | 151.3 | 28.1  |
| Bio 18 - Precipitation of Warmest Quarter (mm)    | 175.5      | 36.0  | 206.7 | 61.1  | 32.1  | 59.0  | 171.2                 | 33.6  | 175.4 | 36.5  |
| Bio 19 - Precipitation of Coldest Quarter (mm)    | 220.4      | 66.5  | 177.8 | 63.2  | 281.9 | 153.3 | 219.4                 | 65.1  | 194.3 | 63.1  |
| Elevation (m a.s.l.)                              | 224.1      | 249.1 | 217.1 | 265.3 | 313.8 | 419.6 | 163.8                 | 172.9 | 181.3 | 166.9 |
| Aspect (degrees)                                  | 201.6      | 106.4 | 185.5 | 107.2 | 191.5 | 96.7  | 179.5                 | 101.6 | 183.9 | 105.7 |
| Slope (degrees)                                   | 0.4        | 0.6   | 0.4   | 0.6   | 1.6   | 1.3   | 1.7                   | 2.3   | 1.4   | 2.2   |

VVN: *V. v. nigrithorax*; VC: *V. crabro*; VO: *V. orientalis*.

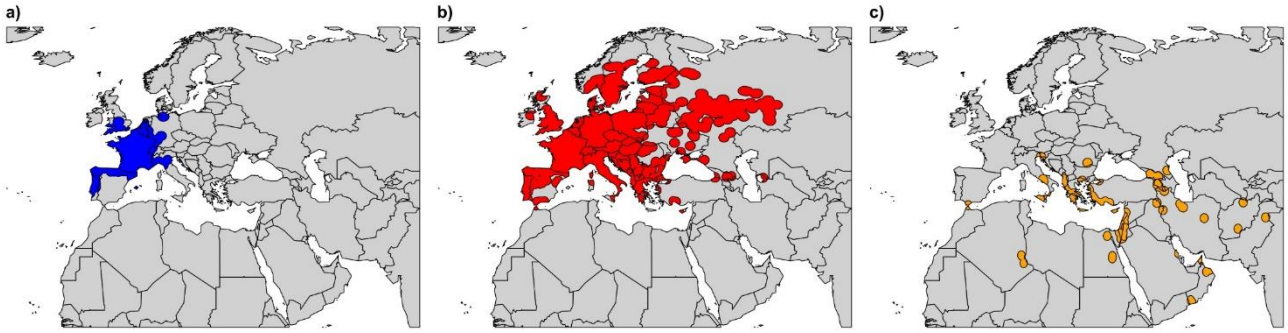

**Figure S1.** Buffer areas of 100 km around the records of *V. v. nigrithorax* (a), *V. crabro* (b) and *V. orientalis* (c) in the western palearctic and saharo-arabian zoogeographic regions. Buffer areas were used for defining the background environment for the PCA-env niche analysis at the study area level.

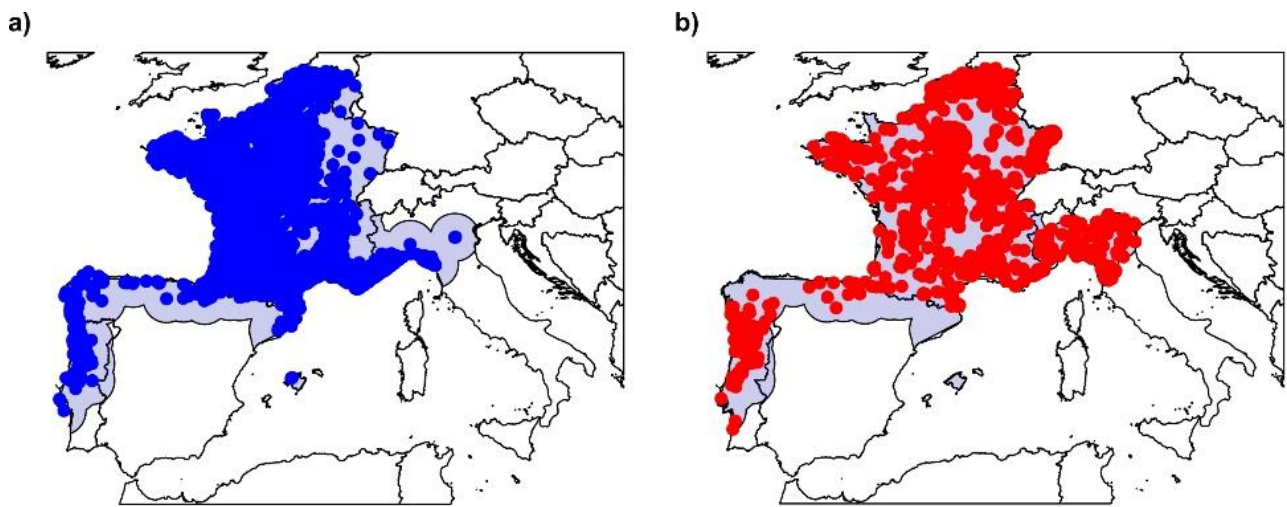

**Figure S2.** Records of *V. v. nigrithorax* (a) and *V. crabro* (b) in the area of co-occurrence of the two species, which has been defined as the 100 km buffer area that encompasses all *V. v. nigrithorax* records within the main colonised countries of Europe, namely, France, Spain, Portugal, Italy, and Belgium. The temporal range of the data is 1990-2021.

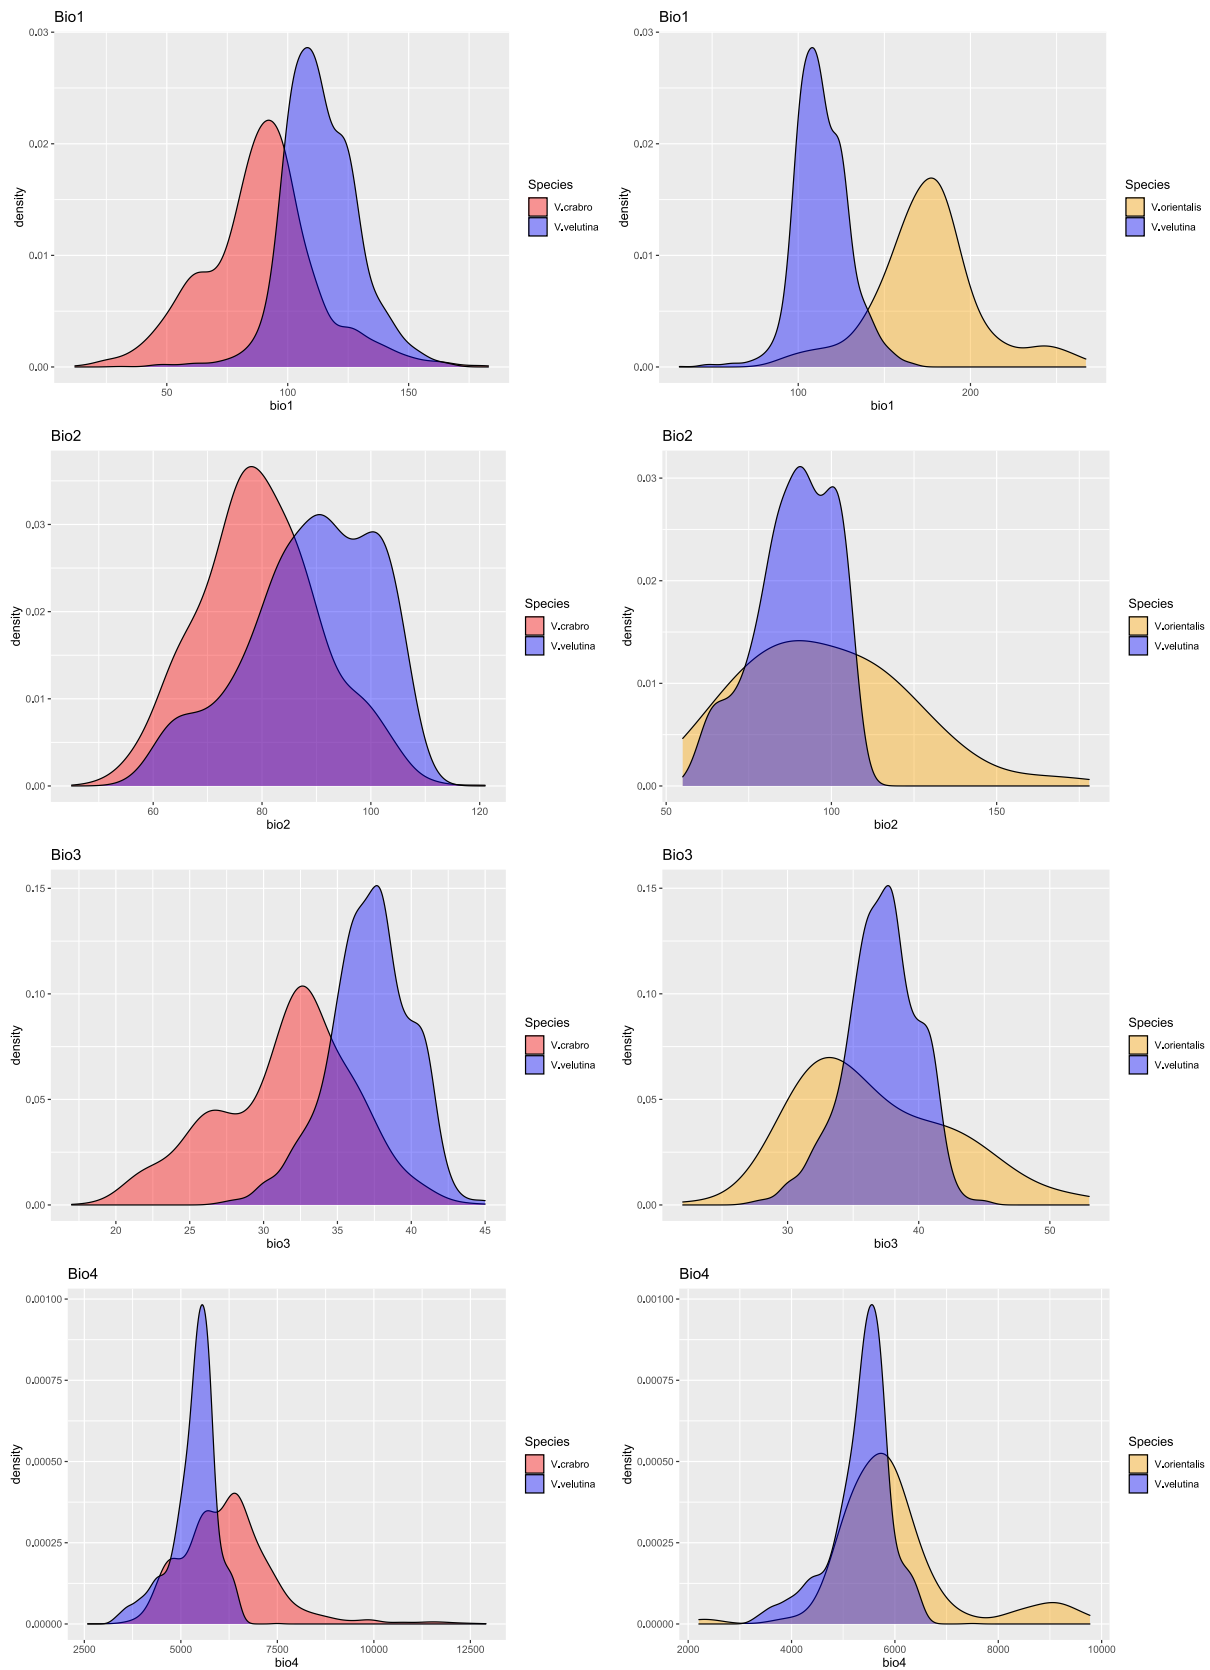

**Figure S3.** Density plots of *V. v. nigrithorax* (blue), *V. crabro* (red) and *V. orientalis* (yellow) at the study area level for Bio1, Bio2, Bio3 and Bio4. Variable detailed explanation can be found at [www.worldclim.org/data/bioclim.html](http://www.worldclim.org/data/bioclim.html).

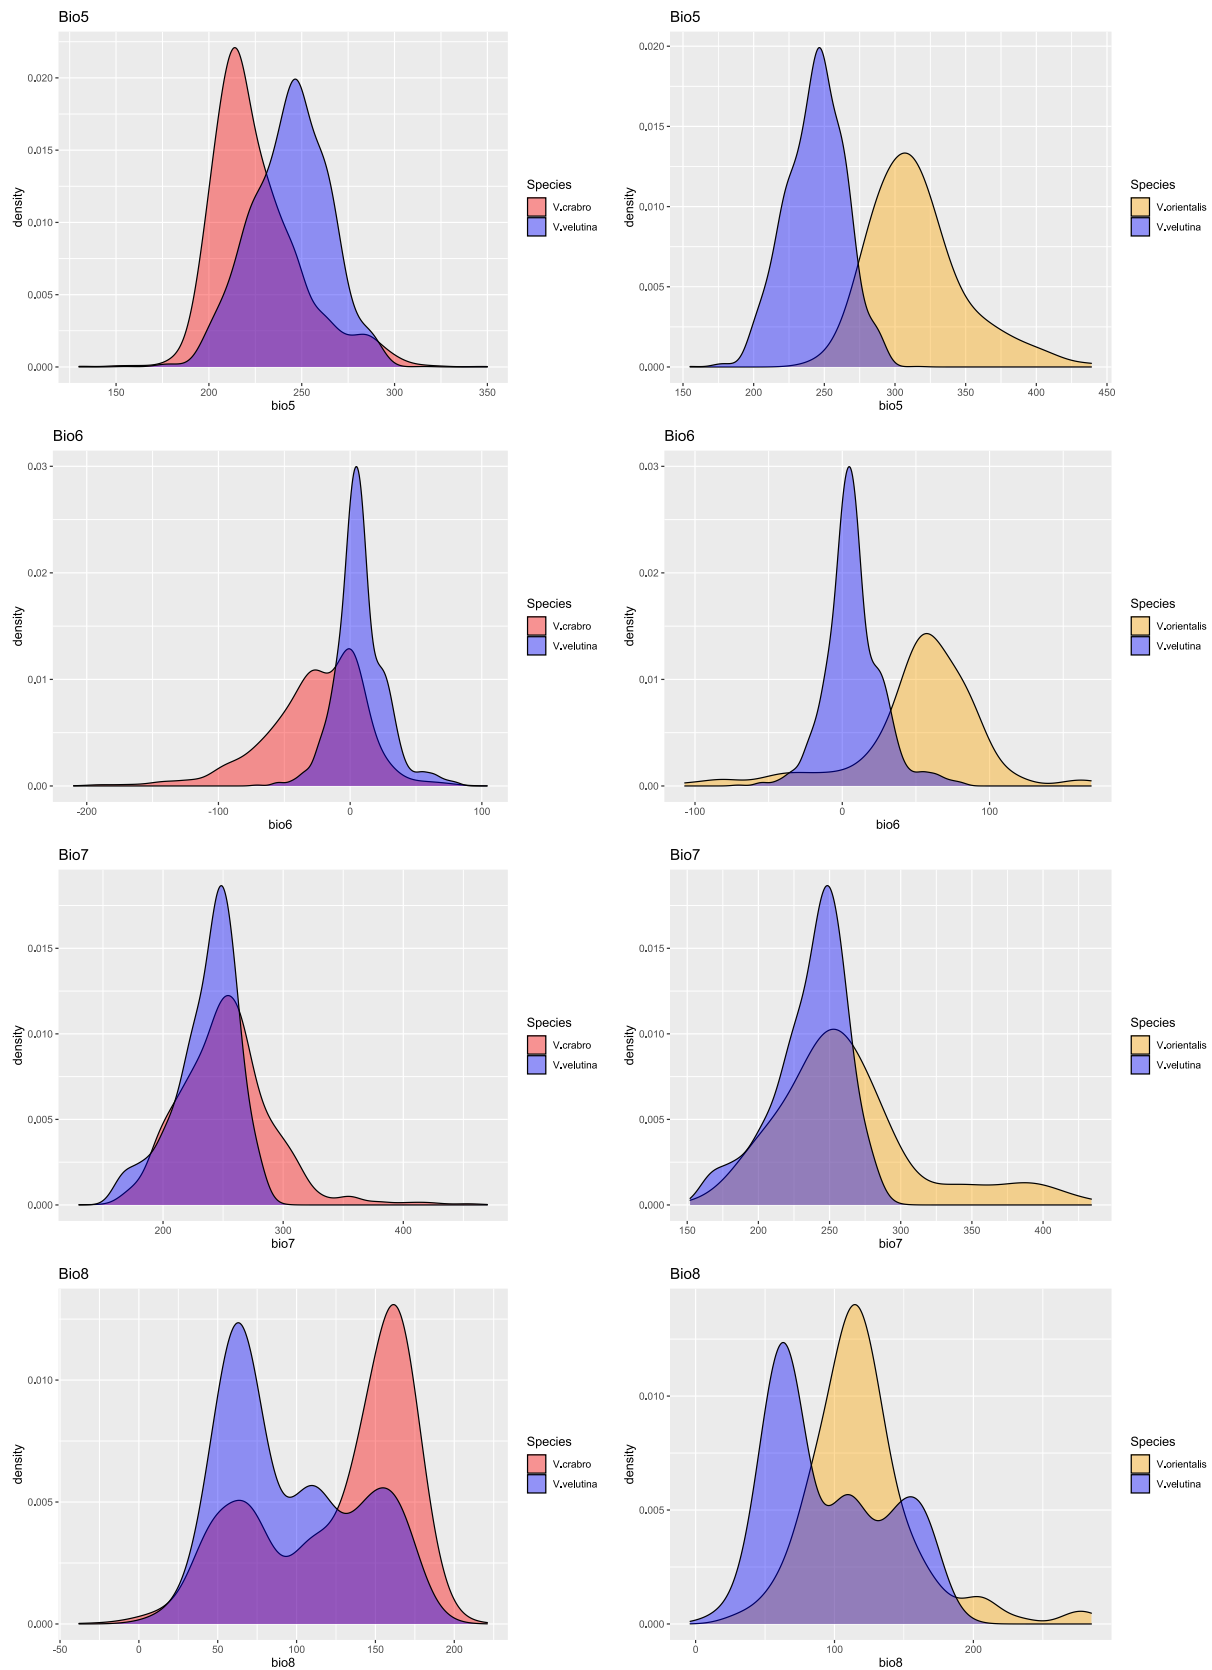

**Figure S4.** Density plots of *V. v. nigrithorax* (blue), *V. crabro* (red) and *V. orientalis* (yellow) at the study area level for Bio5, Bio6, Bio7 and Bio8. Variable detailed explanation can be found at [www.worldclim.org/data/bioclim.html](http://www.worldclim.org/data/bioclim.html).

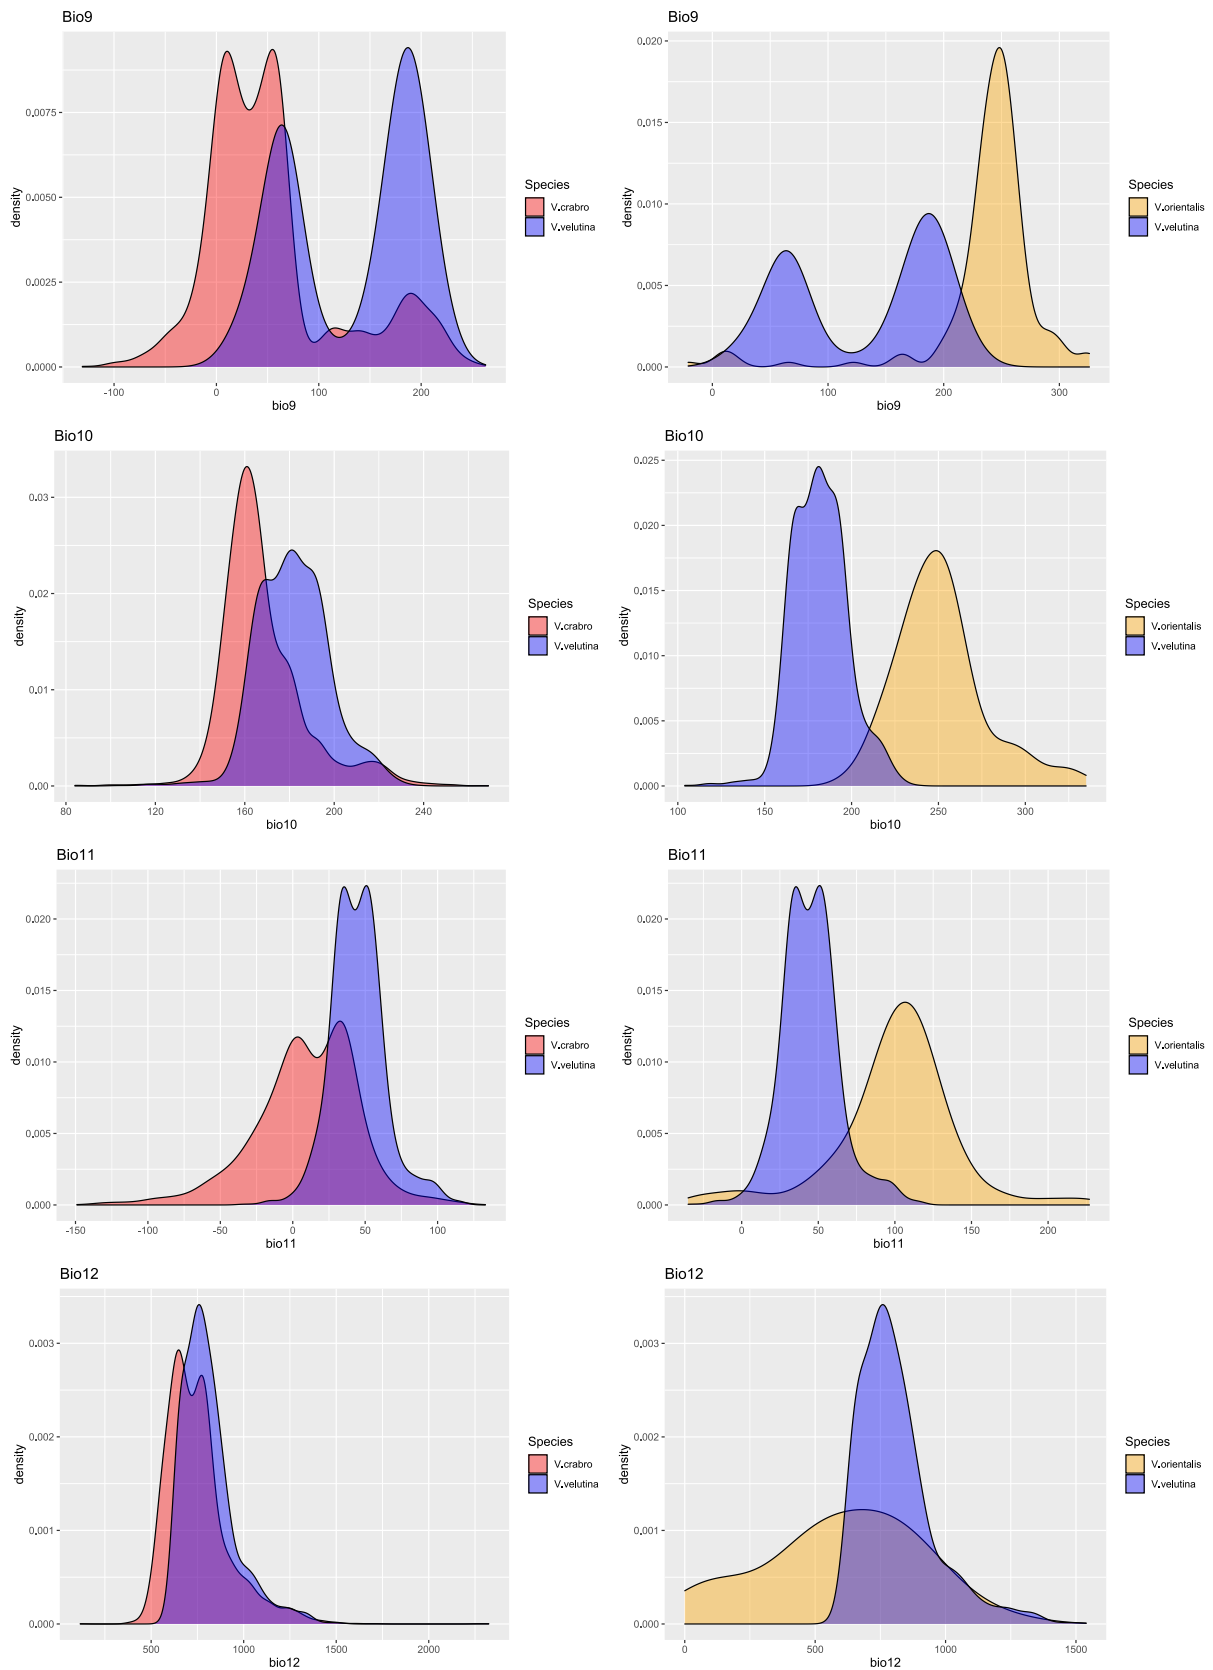

**Figure S5.** Density plots of *V. v. nigrithorax* (blue), *V. crabro* (red) and *V. orientalis* (yellow) at the study area level for Bio9, Bio10, Bio11 and Bio12. Variable detailed explanation can be found at [www.worldclim.org/data/bioclim.html](http://www.worldclim.org/data/bioclim.html).

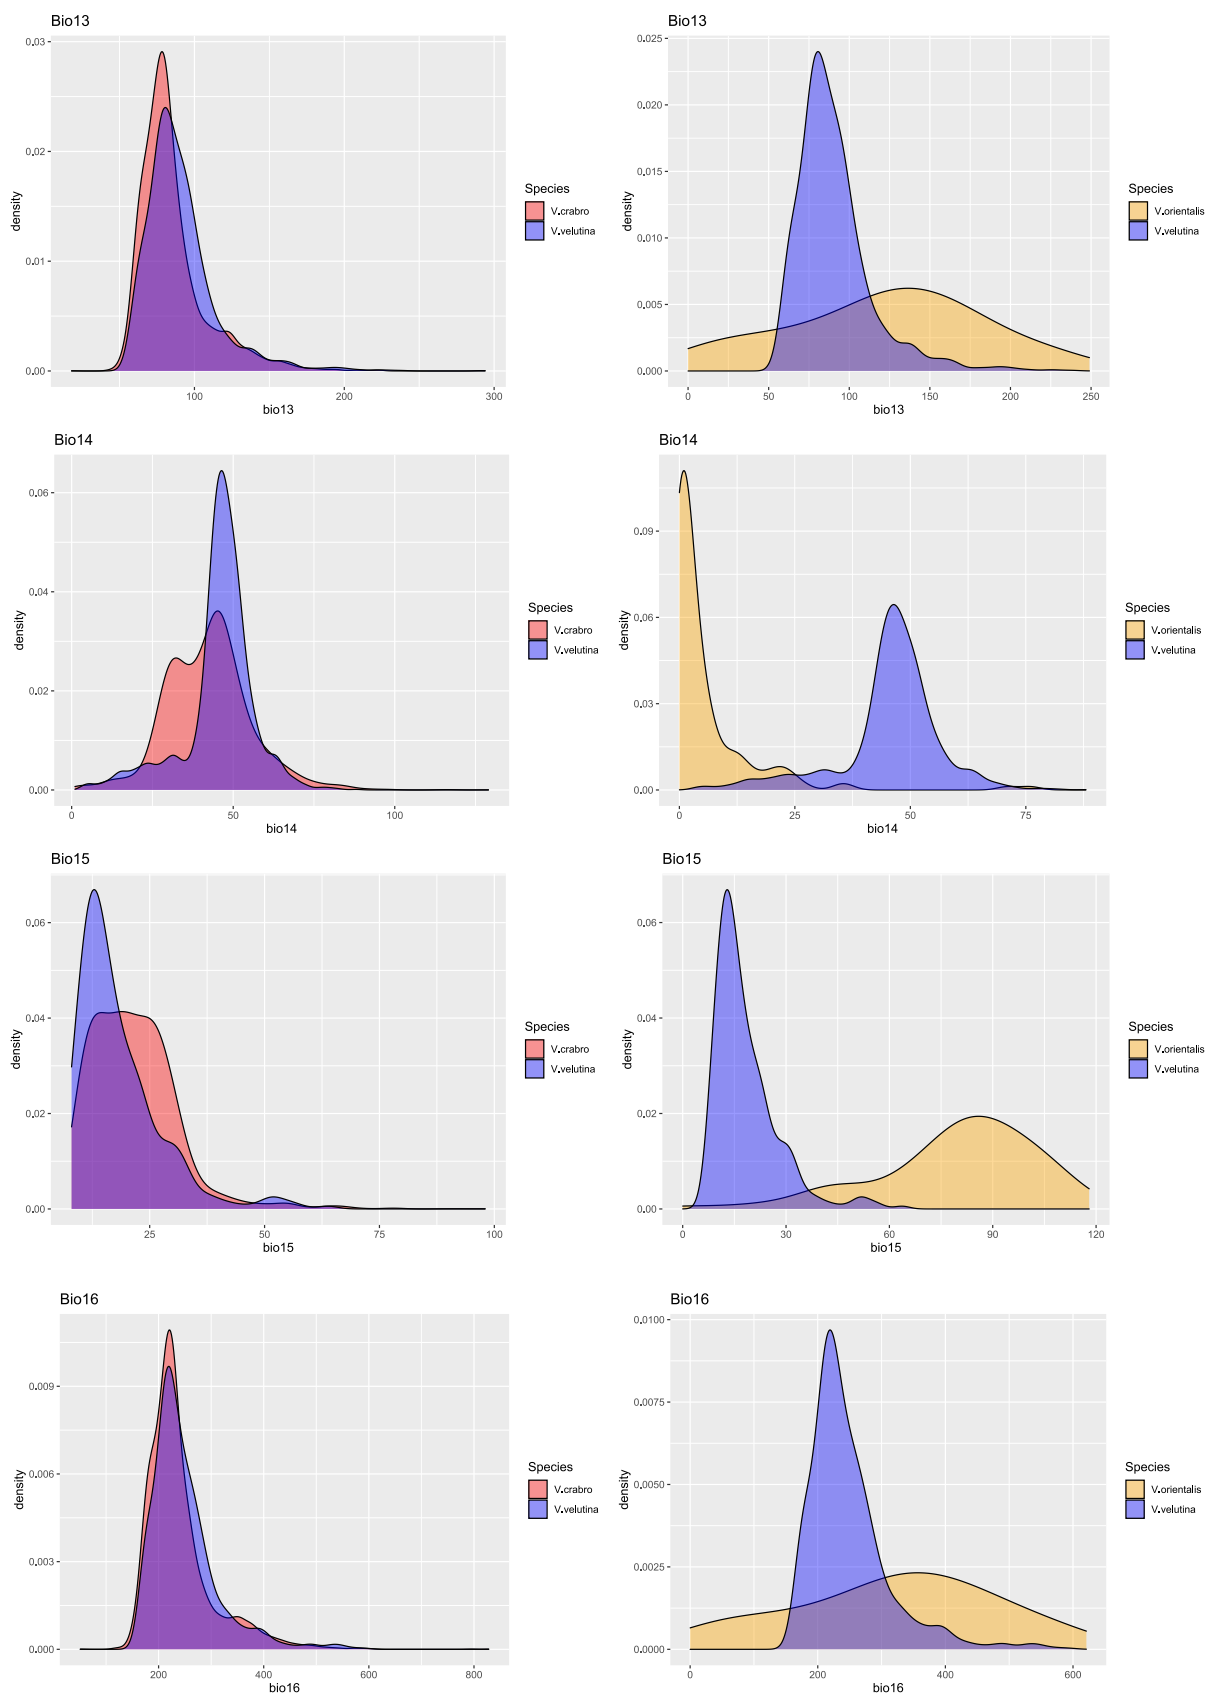

**Figure S6.** Density plots of *V. v. nigrithorax* (blue), *V. crabro* (red) and *V. orientalis* (yellow) at the study area level for Bio13, Bio14, Bio15 and Bio16. Variable detailed explanation can be found at [www.worldclim.org/data/bioclim.html](http://www.worldclim.org/data/bioclim.html).

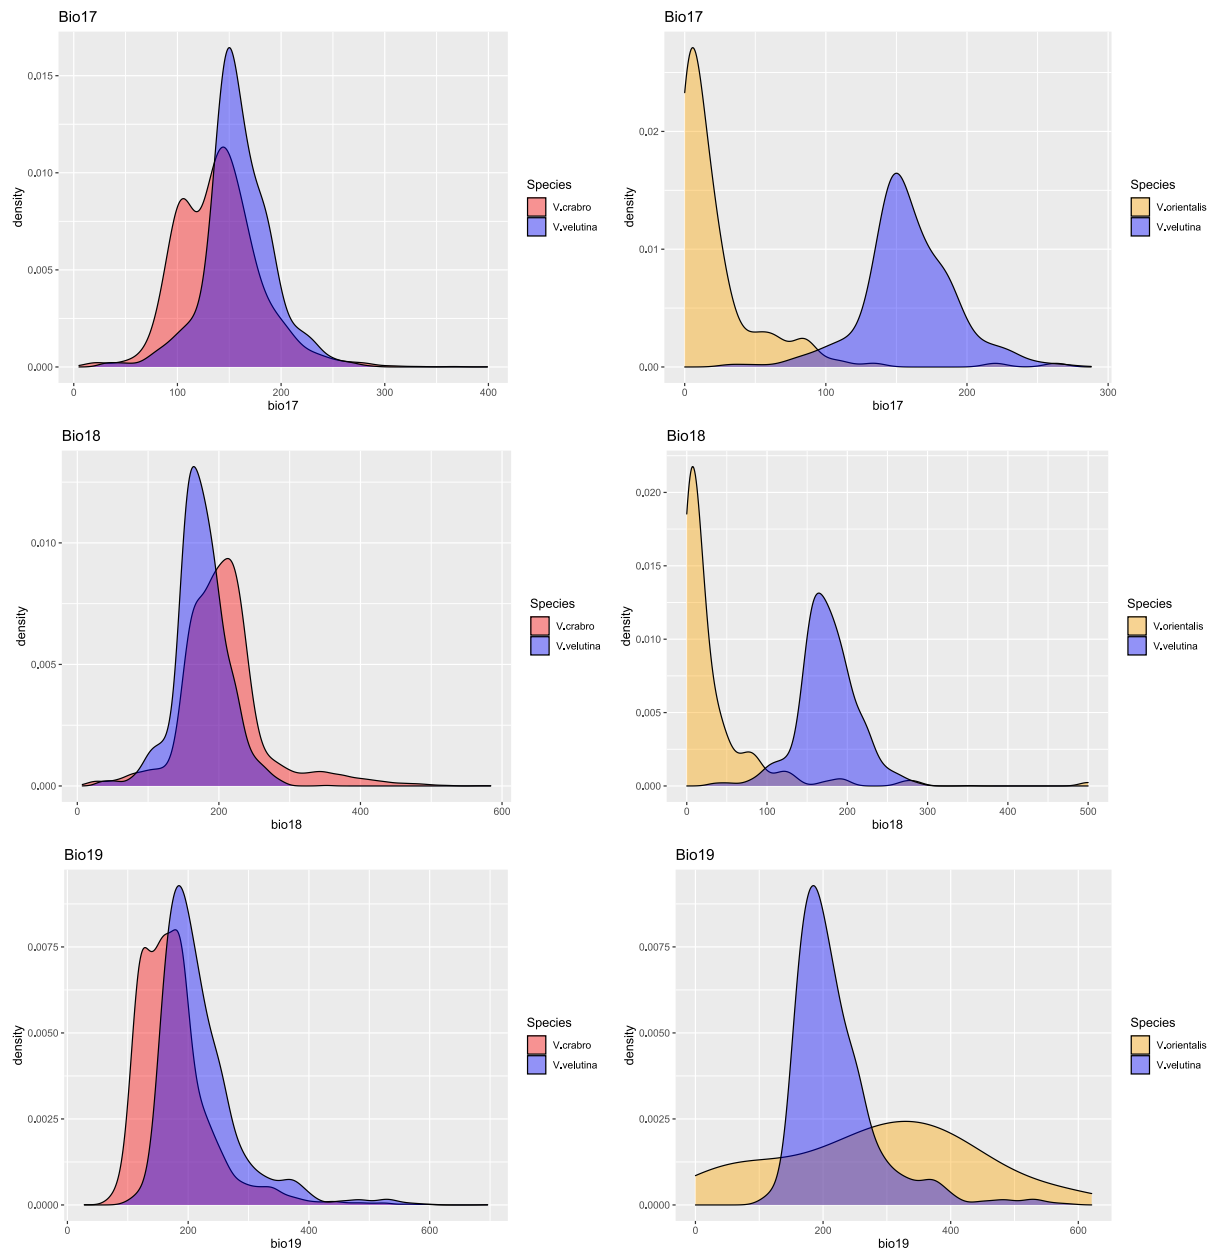

**Figure S7.** Density plots of *V. v. nigrithorax* (blue), *V. crabro* (red) and *V. orientalis* (yellow) at the study area level for Bio17, Bio18 and Bio19. Variable detailed explanation can be found at [www.worldclim.org/data/bioclim.html](http://www.worldclim.org/data/bioclim.html).



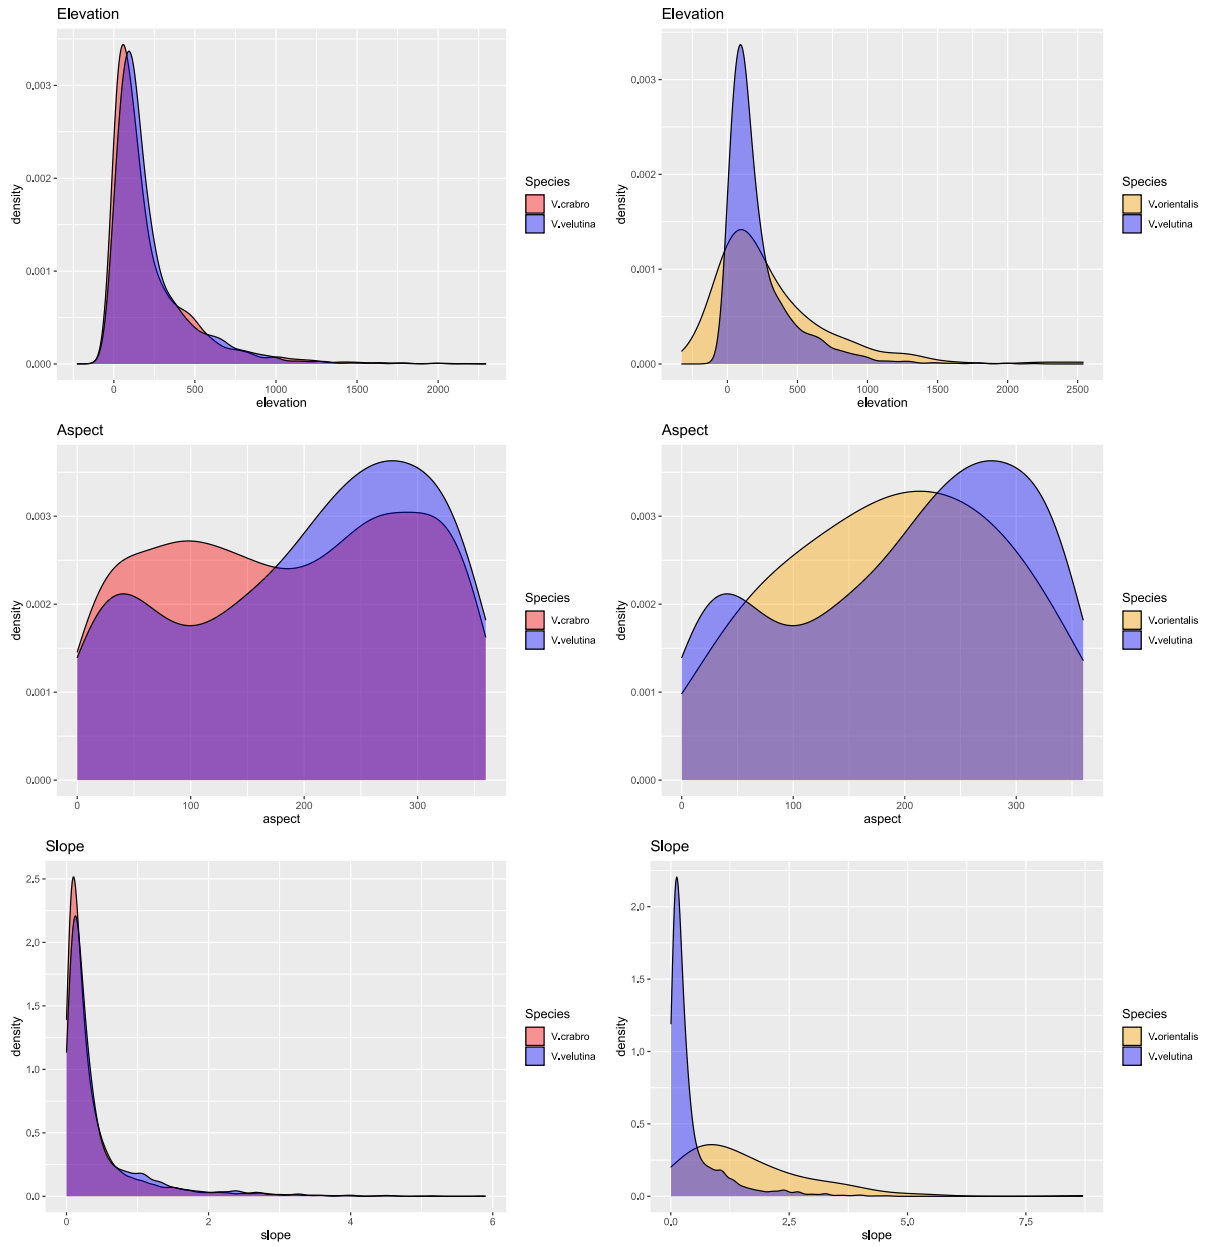

**Figure S8.** Density plots of *V. v. nigrithorax* (blue), *V. crabro* (red) and *V. orientalis* (yellow) at the study area level for the variables elevation, aspect and slope.

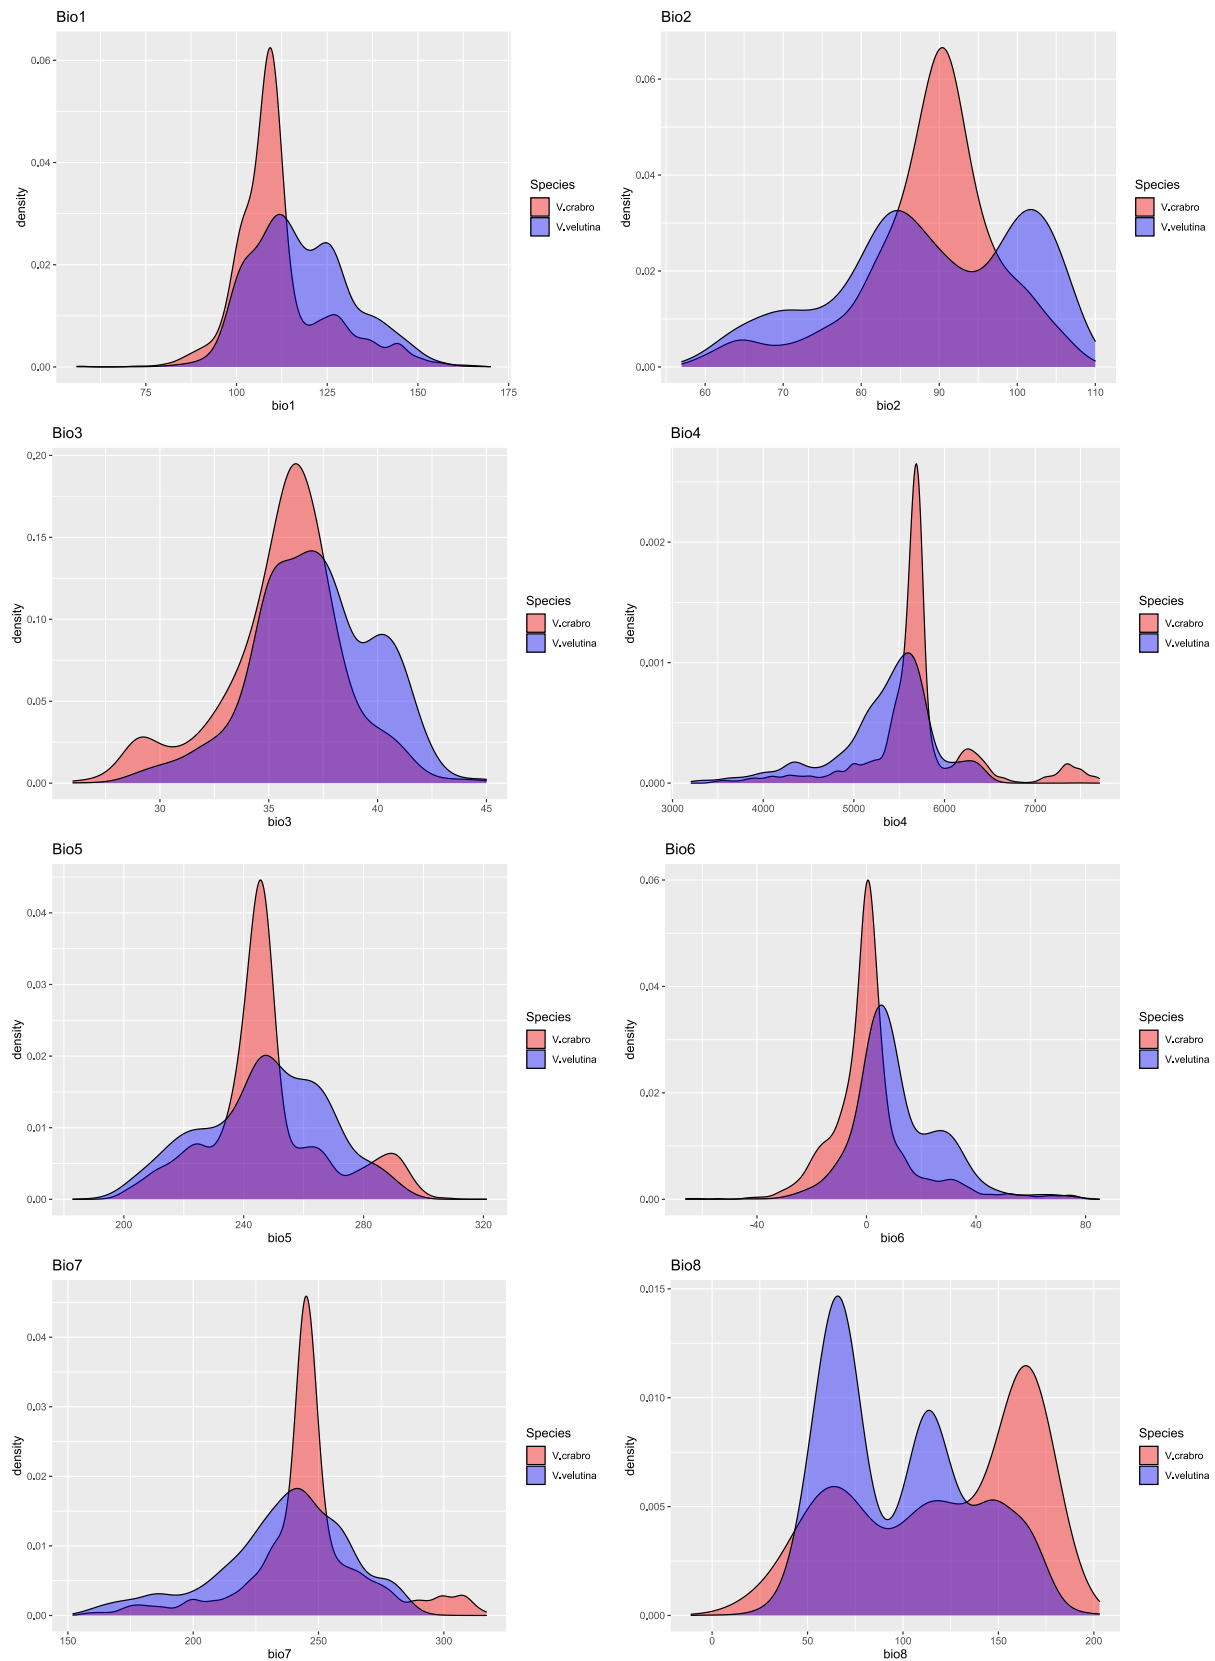

**Figure S9.** Density plots of *V. v. nigrithorax* (blue) and *V. crabro* (red) in the areas of co-occurrence of the two species for Bio1-Bio8. Variable detailed explanation can be found at [www.worldclim.org/data/bioclim.html](http://www.worldclim.org/data/bioclim.html).

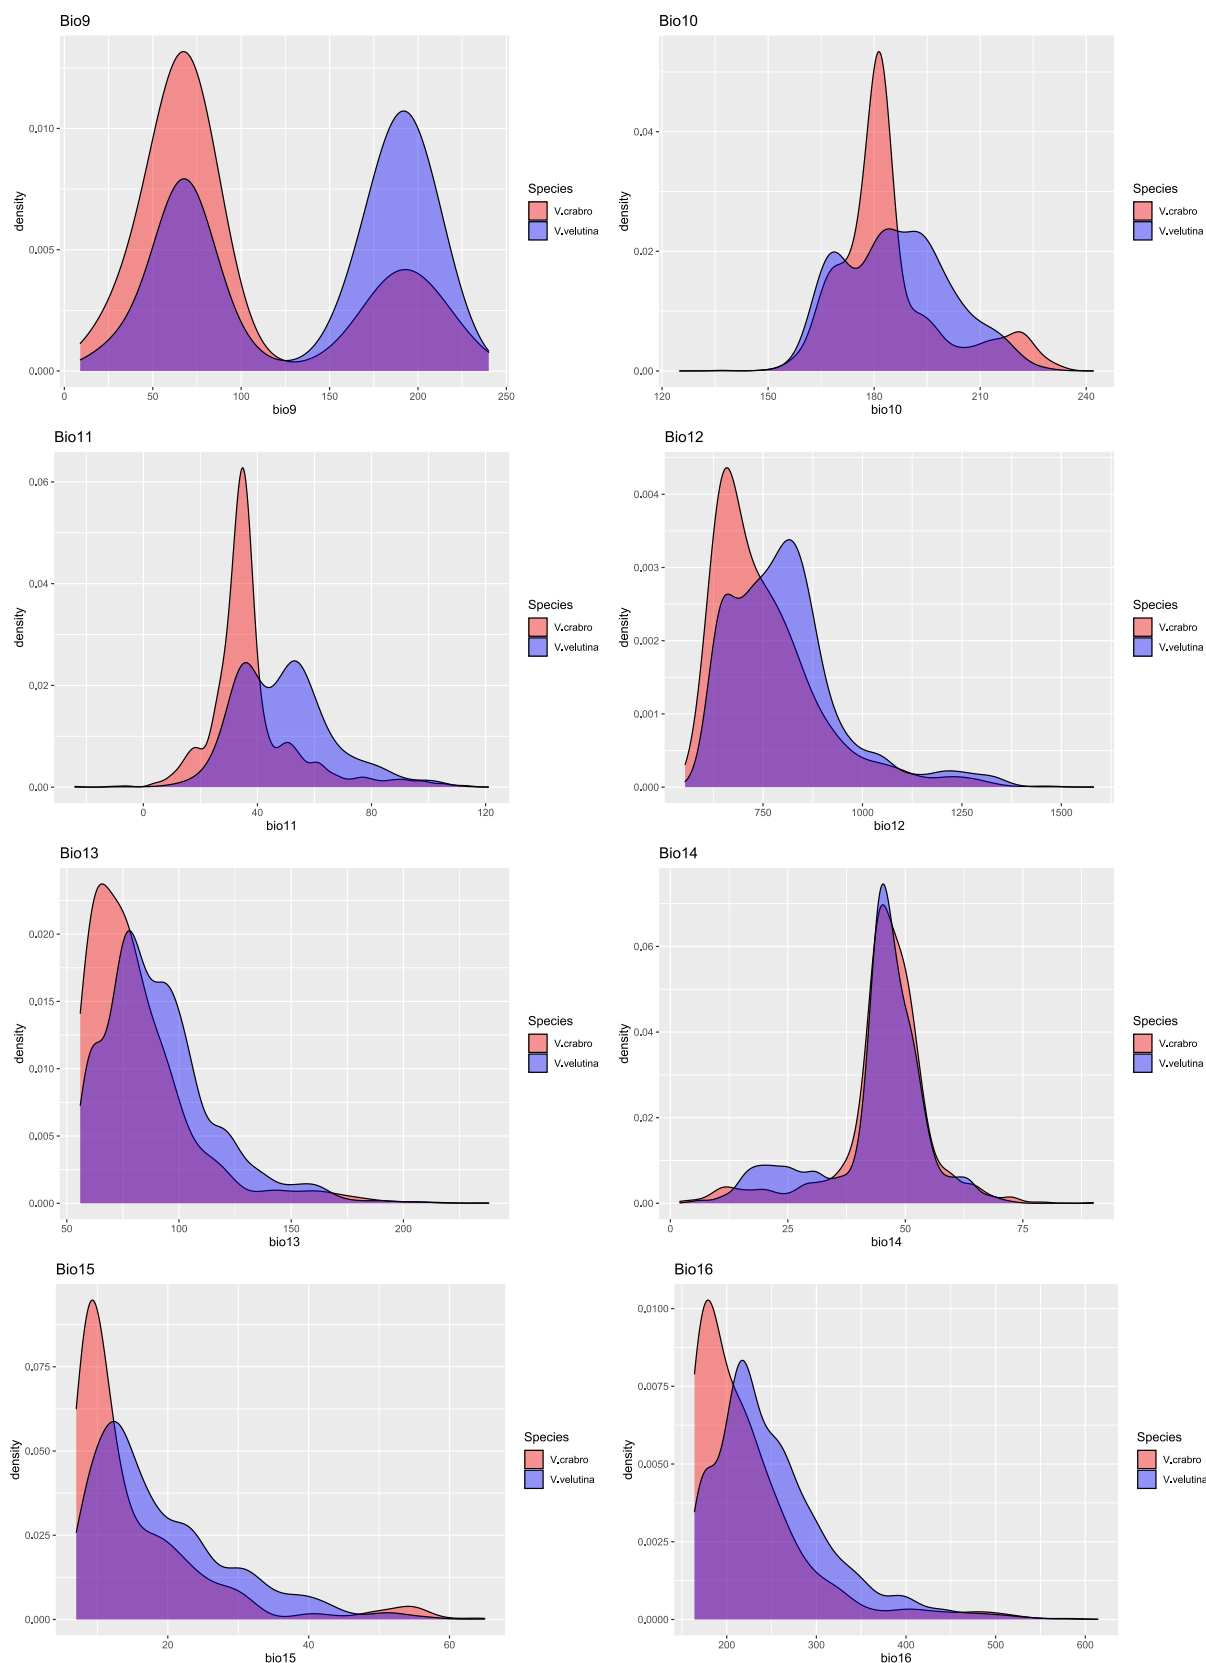

**Figure S10.** Density plots of *V. v. nigrithorax* (blue) and *V. crabro* (red) in the areas of co-occurrence of the two species for Bio9-Bio16. Variable detailed explanation can be found at [www.worldclim.org/data/bioclim.html](http://www.worldclim.org/data/bioclim.html).

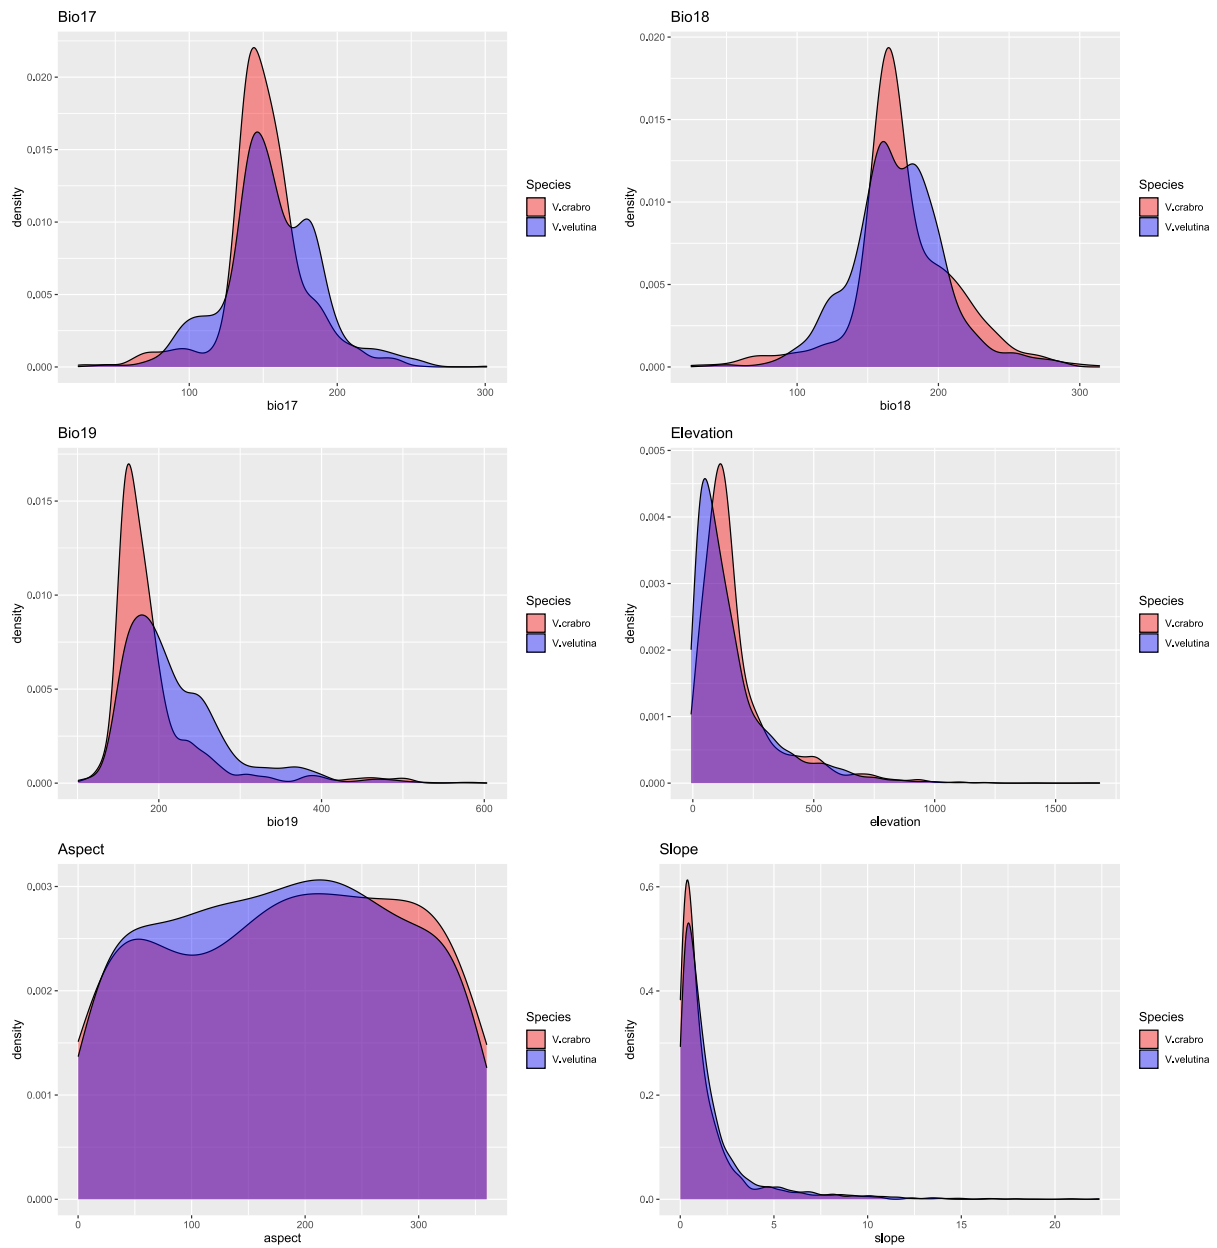

**Figure S11.** Density plots of *V. v. nigrithorax* (blue) and *V. crabro* (red) in the areas of co-occurrence of the two species for the variables Bio17-Bio19, elevation, aspect and slope. Variable detailed explanation of bioclimatic variable can be found at [www.worldclim.org/data/bioclim.html](http://www.worldclim.org/data/bioclim.html).
